# Supplementary material for: ZNF185 prevents stress fiber formation through the inhibition of RhoA in endothelial cells
Source: PubMed Central journal article supplement (PMC9834212; doi:10.1038/s42003-023-04416-x), 2023-01-11
Supplement: 42003_2023_4416_MOESM2_ESM.pdf [file 42003_2023_4416_MOESM2_ESM.pdf]

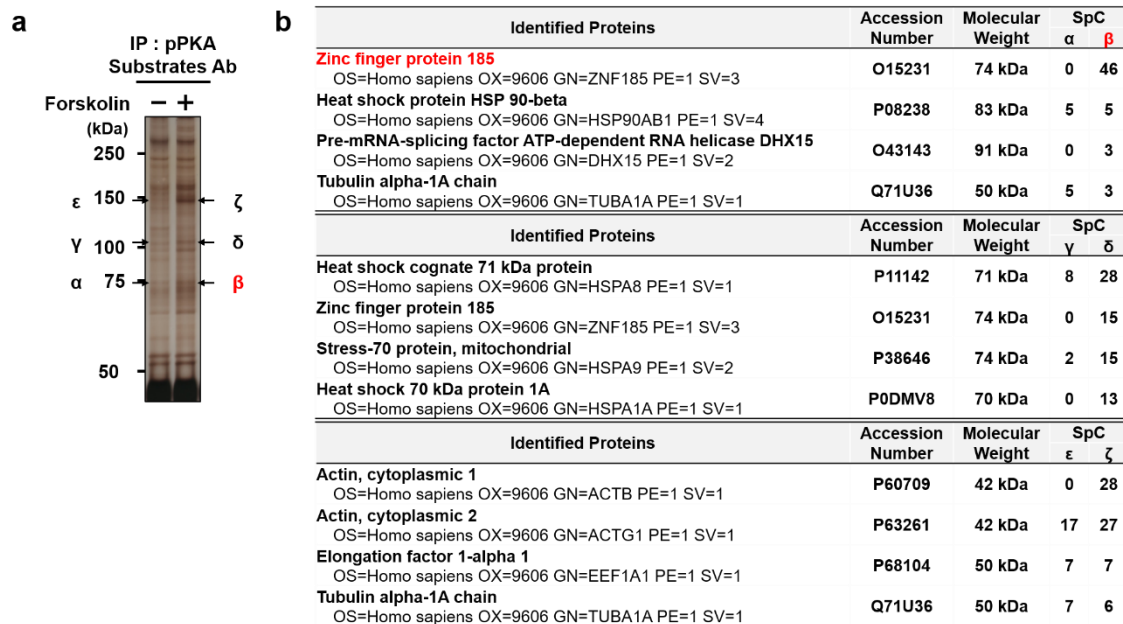

### Supplementary Figure 1 Screening for PKA substrates in HUVECs.

**a.** Representative image of the silver-stained gel is presented in Fig. 1b. Forskolin (10  $\mu$ M) was added to HUVECs for 1 h. **b.** Identified proteins by LC-MS/MS. An immunoprecipitated PKA substrate indicated by  $\beta$  was identified as ZNF185. Three bands ( $\beta$ ,  $\delta$ , and  $\zeta$ ) and their control bands ( $\alpha$ ,  $\gamma$ , and  $\epsilon$ ) were excised from the gels. SpC: spectral count.

**a**

---

**The amino acid sequence of human ZNF185 (isoform 4)**

|     |            |            |            |            |            |            |            |            |            |            |
|-----|------------|------------|------------|------------|------------|------------|------------|------------|------------|------------|
| 1   | MSISALGGRT | KGKPLPPGEE | ERNNVLKQMK | VRTTLKGDKS | WITKQDESEG | RTIELPSGRS | RATSFSSAGE | VPKPRPPSTR | APTYGIIRGV | FTKPIDSSSQ |
| 101 | PQQQFPKANG | TPKSAASLVR | TANAGPPRPS | SSGYKMTTED | YKKLAPYNIR | RSSTSGDTEE | EEEEEVVDFS | SDEQKRRSEA | ASGVLRRRAP | REHSYVLSAA |
| 201 | KKSTGPTQET | QAPFIAKRVE | VVEEDGPSEK | SQDPPALARS | TPGSNSADGG | RTKASRAIWI | ECLPSMPSA  | GSQELSSRGE | EIVRLQILTP | RAGLRLVAPD |
| 301 | VEGMRSSPGN | KDKEAPCSRE | LQRDLAGEEA | FRAPNTDAAR | SSAQLSDGNV | GSGATGSRPE | GLAAVDIGSE | RGSSSATSVS | AVPADRKSNS | TAAQEDAKAD |
| 401 | PKGALADYEG | KDVATRVGEA | WQERPGAPRG | GQGDPAVPAQ | QPADPSTPER | QSSPSGSEQL | VRRESCGSSV | LDFEGKDVA  | TKVGEAWQDR | PGAPRGGQGD |
| 501 | PAVPTQQPAD | PSTPEQQNSP | SGSEQFVRRR | SCTSRVRSPS | SCMVTVTVTA | TSEQPHIYIP | APASELDSSS | TTKGILFVKE | YVNASEVSSG | KPVSARYSNV |
| 601 | SSIEDSFAME | KKPPCGSTPY | SERTTGGICT | YCNREIRDCP | KITLEHLGIC | CHEYCFKCGI | CSKPMGDLLD | QIFIHRDTHI | CGKCYEKL   |            |

---

**b**

---

**The amino acid sequence of human ZNF185-ΔPKA**

|     |            |            |            |            |            |            |            |            |            |            |
|-----|------------|------------|------------|------------|------------|------------|------------|------------|------------|------------|
| 1   | MSISALGGRT | KGKPLPPGEE | ERNNVLKQMK | VRTTLKGDKS | WITKQDESEG | RTIELPSGRS | RATSFSSAGE | VPKPRPPSTR | APTYGIIRGV | FTKPIDSSSQ |
| 101 | PQQQFPKANG | TPKSAASLVR | TANAGPPRPS | SSGYKMTTED | YKKLAPYNIR | RSSTSGDTEE | EEEEEVVDFS | SDEQKRRSEA | ASGVLRRRAP | REHSYVLSAA |
| 201 | KKSTGPTQET | QAPFIAKRVE | VVEEDGPSEK | SQDPPALARS | TPGSNSADGG | RTKASRAIWI | ECLPSMPSA  | GSQELSSRGE | EIVRLQILTP | RAGLRLVAPD |
| 301 | VEGMRSSPGN | KDKEAPCSRE | LQRDLAGEEA | FRAPNTDAAR | SSAQLSDGNV | GSGATGSRPE | GLAAVDIGSE | RGSSSATSVS | AVPADRKSNS | TAAQEDAKAD |
| 401 | PKGALADYEG | KDVATRVGEA | WQERPGAPRG | GQGDPAVPAQ | QPADPSTPER | QSSPSGSEQL | VRRESCGSSV | LDFEGKDVA  | TKVGEAWQDR | PGAPRGGQGD |
| 501 | PAVPTQQPAD | PSTPEQQNSP | SGSEQFVRRR | SCT        |            |            |            |            |            |            |
| 601 | SFAME      | KKPPCGSTPY | SERTTGGICT | YCNREIRDCP | KITLEHLGIC | CHEYCFKCGI | CSKPMGDLLD | QIFIHRDTHI | CGKCYEKL   |            |

---

**Supplementary Figure 2 The amino acid sequence of ZNF185.**

**a, b.** ZNF185 isoform 4 and ZNF185-ΔPKA are shown. Three RRXS motifs are indicated in red.

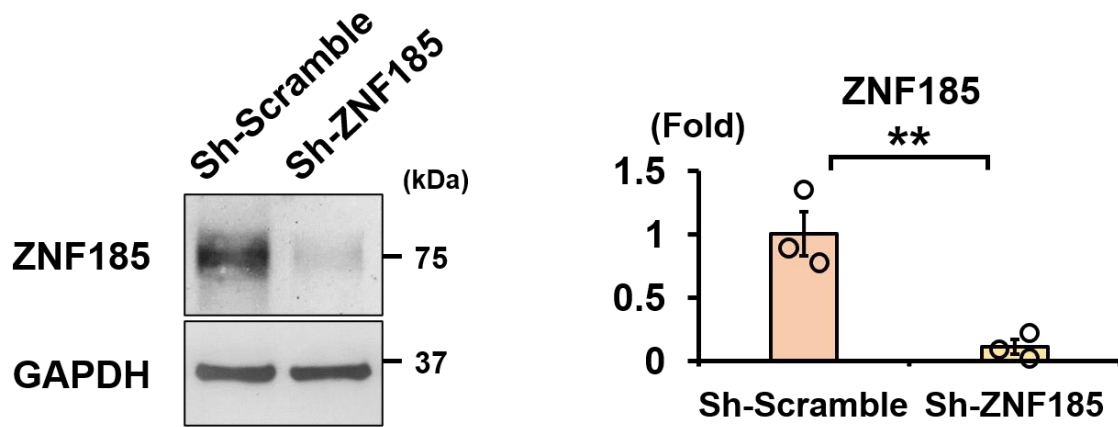

**Supplementary Figure 3 The protein expression of ZNF185 is reduced by ZNF185 knockdown.**

The endogenous expression of ZNF185 is reduced by ZNF185 knockdown.

Representative blots are shown ( $n = 3$ ). Densitometric analysis of ZNF185.  $**p < 0.01$

( $n = 3$ ). Data are presented as the mean  $\pm$  standard error.

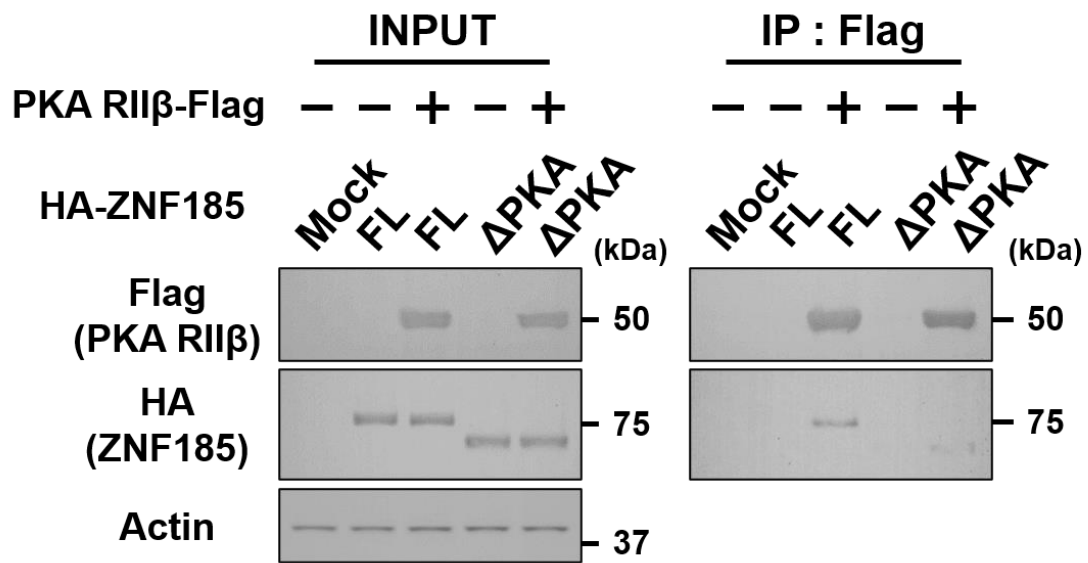

Supplementary Figure 4 PKA RII $\beta$  does not interact with deletion mutant of ZNF185 ( $\Delta$ aa 534-605).

PKA RII $\beta$ -Flag and HA-ZNF185 are overexpressed in HEK293T cells. Anti-Flag beads were used for coimmunoprecipitation. Representative blots are shown ( $n = 3$ ).

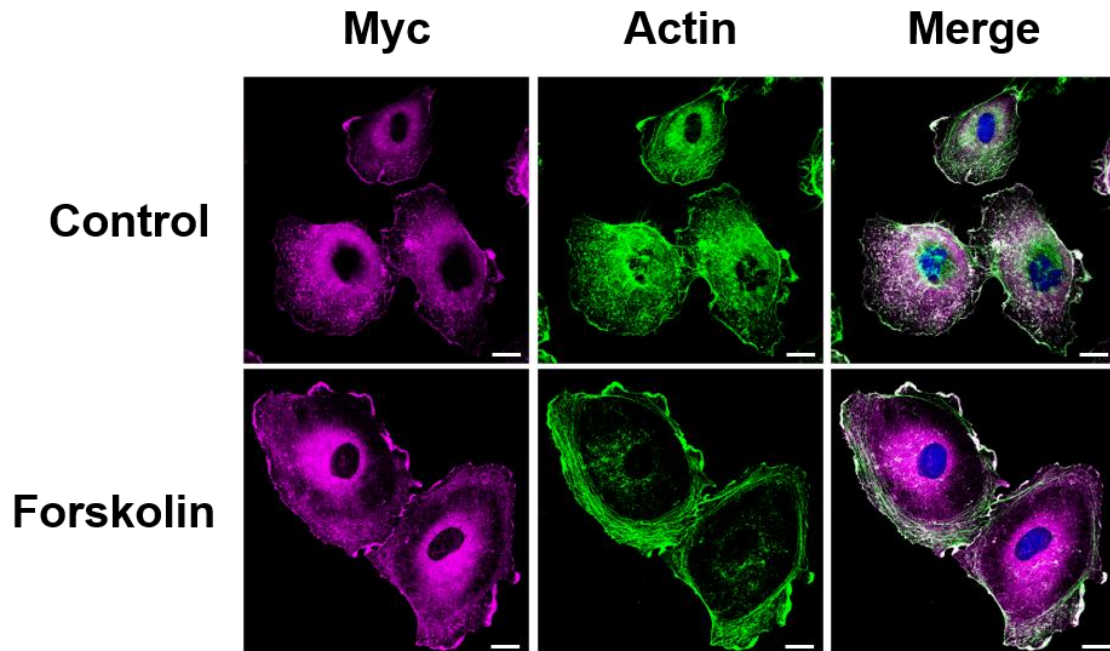

**Supplementary Figure 5 ZNF185 colocalizes with actin.**

ZNF185 and actin are colocalized. Immunofluorescence staining of Myc (magenta) and actin (green) in HUVECs overexpressing Myc-ZNF185-HA. Forskolin (10  $\mu$ M) was administered to HUVECs for 1h. Representative images are shown ( $n = 3$ ). Scale bars, 10  $\mu$ m.

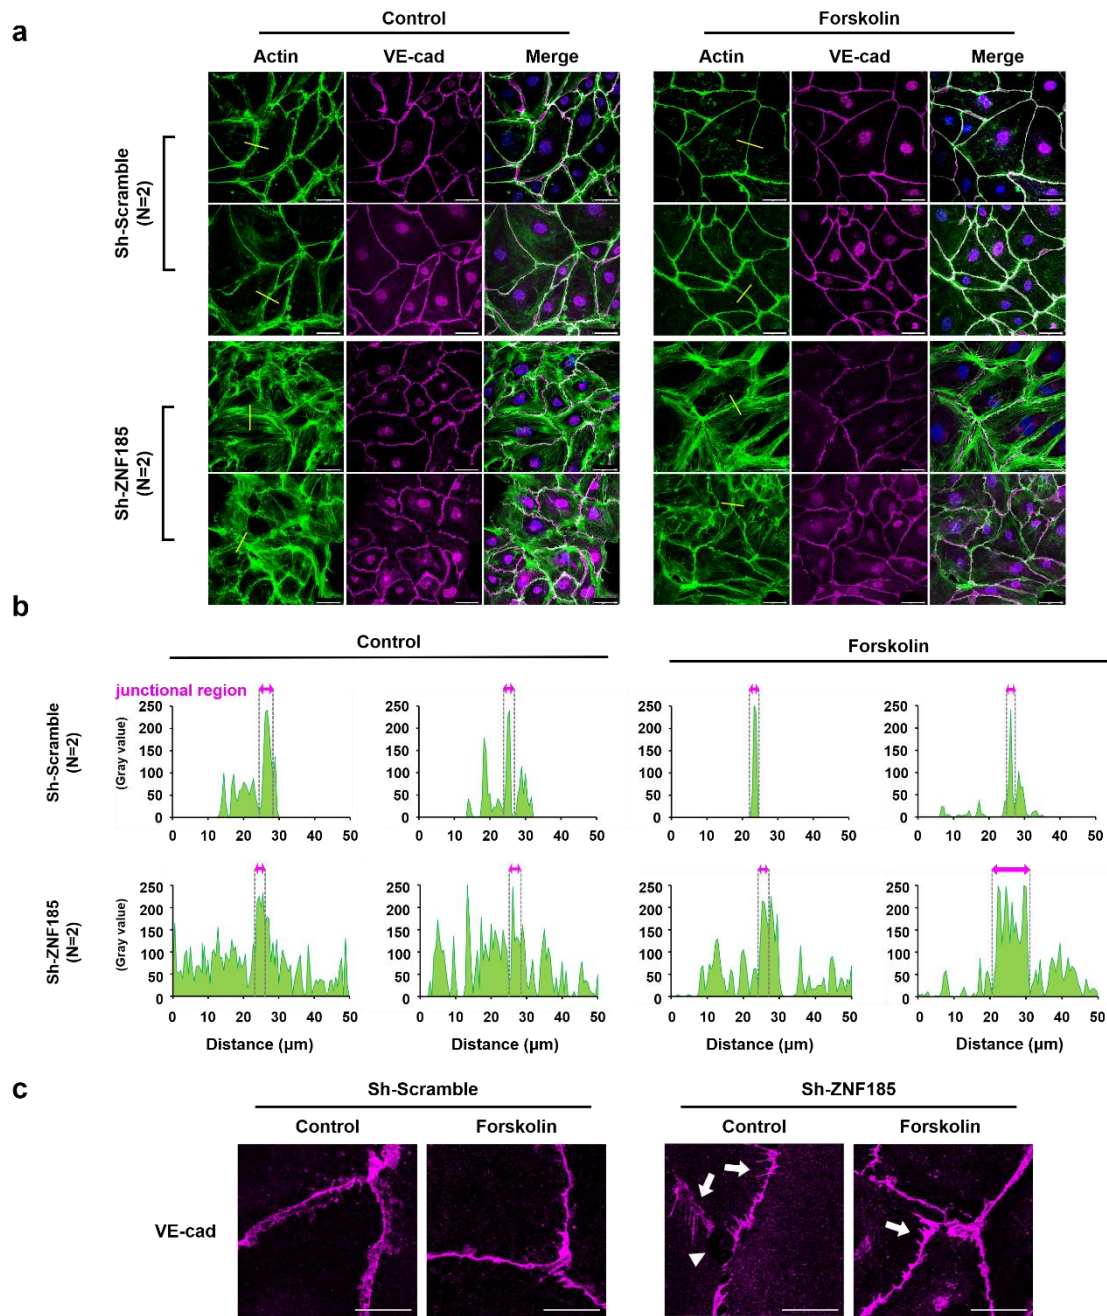

**Supplementary Figure 6 ZNF185 knockdown-induced stress fiber formation and discontinuous junctions.**

**a, b.** ZNF185 knockdown induces stress fiber formation and discontinuous cell-cell junctions. **a.** Multiple views from two independent experiments are shown.

Immunofluorescence staining of actin (green) and VE-cadherin (magenta). Scale bars, 50  $\mu\text{m}$ . **b.** Intensity of stress fibers at the yellow lines was quantified. **c.** Enlarged views of fig. 3b are shown. Immunofluorescence staining of VE-cadherin (magenta). Arrows indicate discontinuous zig-zag junctions. Arrowheads indicate intercellular gaps. Scale bars, 25  $\mu\text{m}$ .

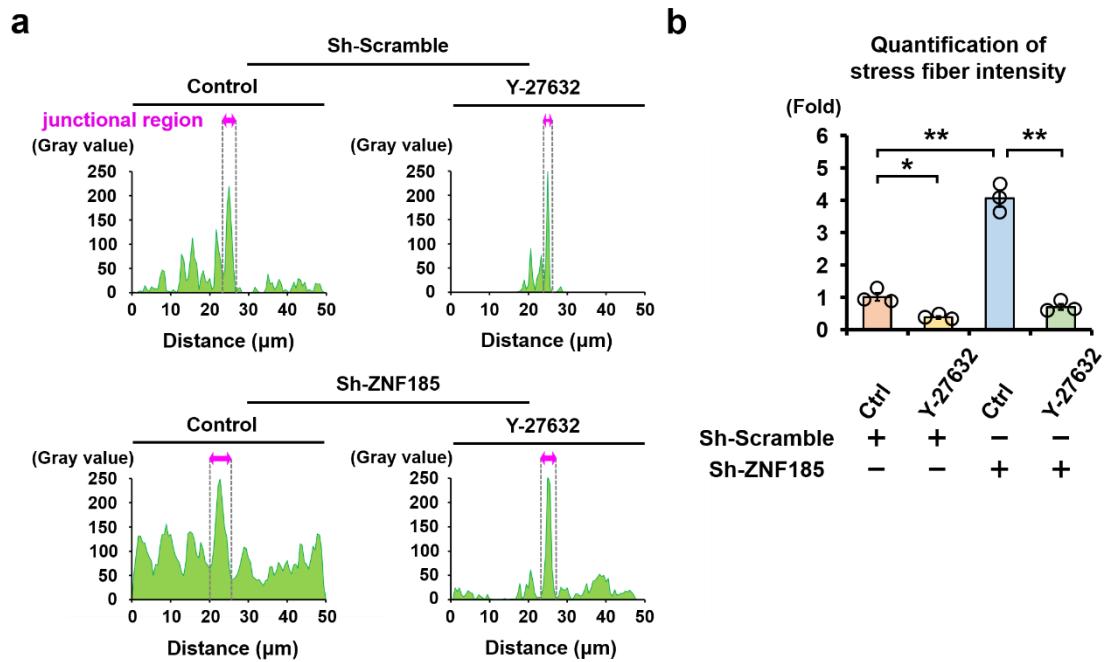

**Supplementary Figure 7 Quantification of stress fibers in Fig. 4d.**

**a.** Intensity of stress fiber formation at the yellow lines in Fig. 4d was quantified. **b.** The bar graph shows total amount of stress fiber intensity in Supplementary Fig. 7a. Two-sided Student's t test,  $*p < 0.05$ ,  $**p < 0.01$  ( $n = 3$ ). Data are presented as the mean  $\pm$  standard error. Ctrl: control.



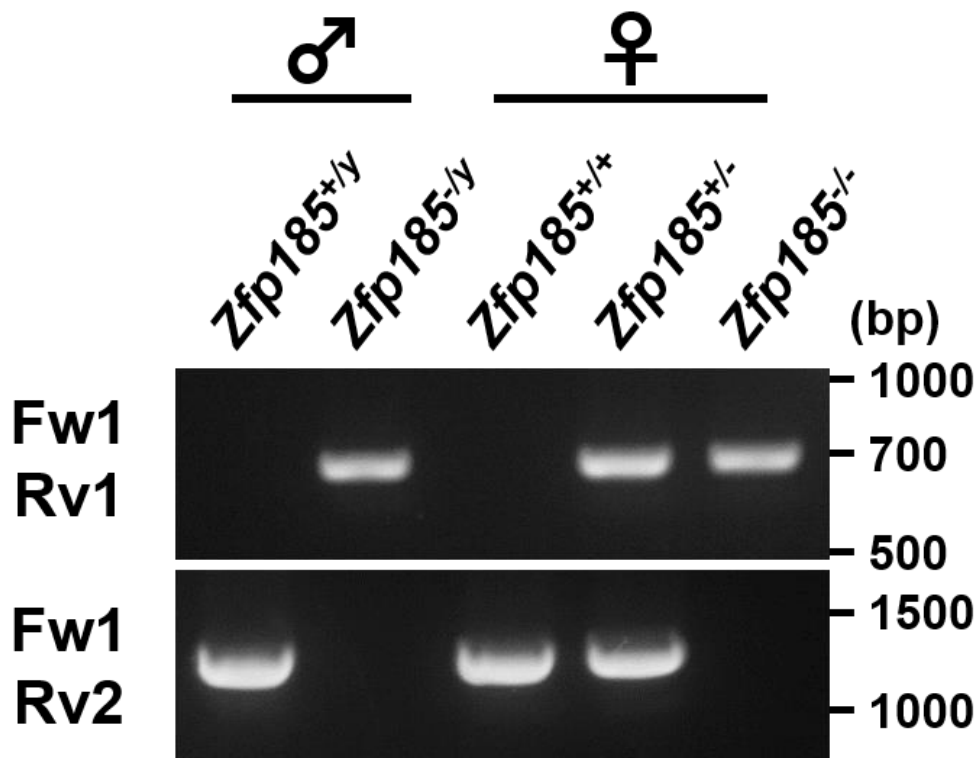

**Supplementary Figure 8 Genotyping of *Zfp185* knockout mice.**

*Zfp185* gene is amplified by PCR from genomic DNA of *Zfp185*<sup>+/y</sup>, *Zfp185*<sup>-/y</sup>, *Zfp185*<sup>+/+</sup>,

*Zfp185*<sup>+/-</sup>, *Zfp185*<sup>-/-</sup> mice.

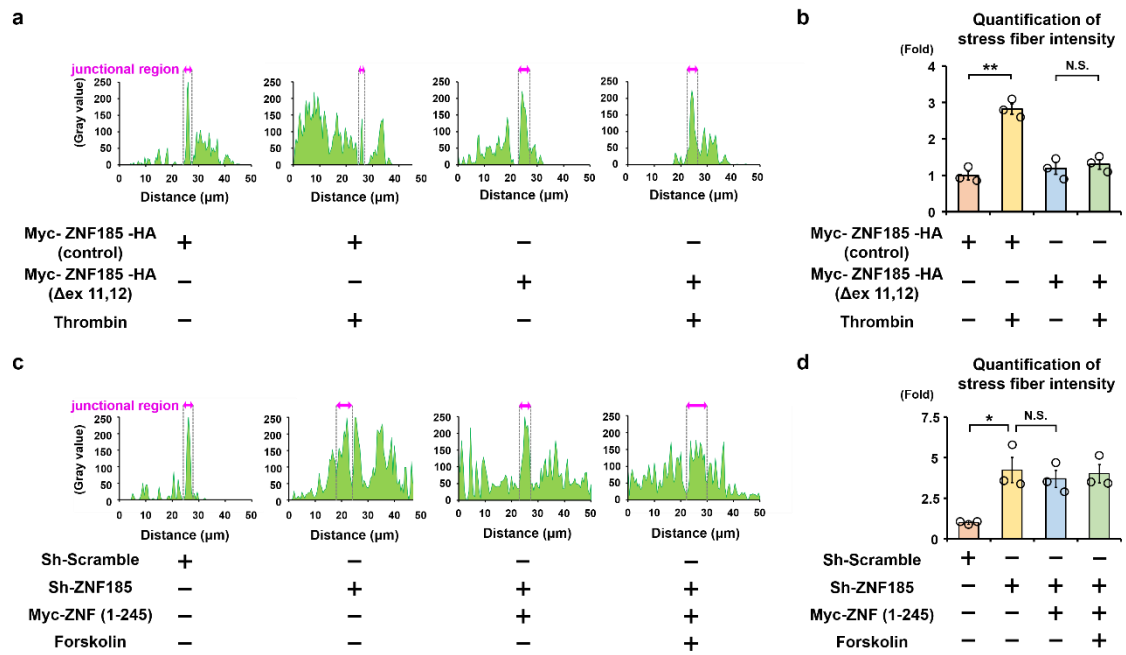

### Supplementary Figure 9 Quantification of stress fibers in Fig. 8.

**a, b.** Quantification of stress fibers in Fig. 8a. **a.** Stress fiber formation at the yellow lines was quantified. **b.** The bar graph shows total amount of stress fiber intensity in Supplementary Fig. 9a. Two-sided Student's t test,  $**p < 0.01$  ( $n = 3$ ). **c, d.** Quantification of stress fibers in Fig. 8e. **c.** Stress fiber formation at the yellow lines was quantified. **d.** The bar graph shows total amount of stress fiber intensity in Supplementary Fig. 9c. Two-sided Student's t test,  $*p < 0.05$  ( $n = 3$ ). Data are presented as the mean  $\pm$  standard error.

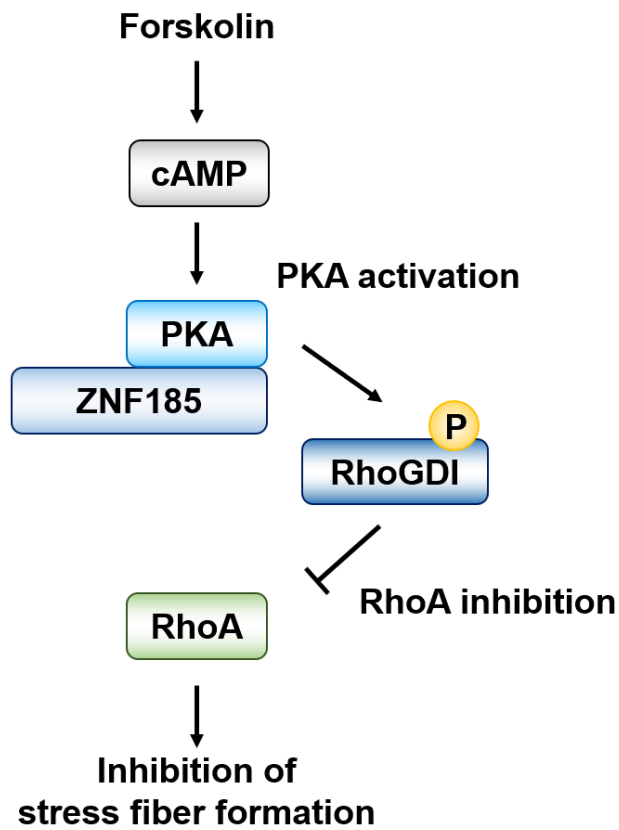

**Supplementary Figure 10 A schematic signaling pathway of cAMP/PKA/RhoA.**

Forskolin increases intracellular cAMP levels and activates PKA. ZNF185 mediates PKA-induced phosphorylation of RhoGDI $\alpha$  at S174 leading to inhibition of RhoA activity and stress fiber formation.

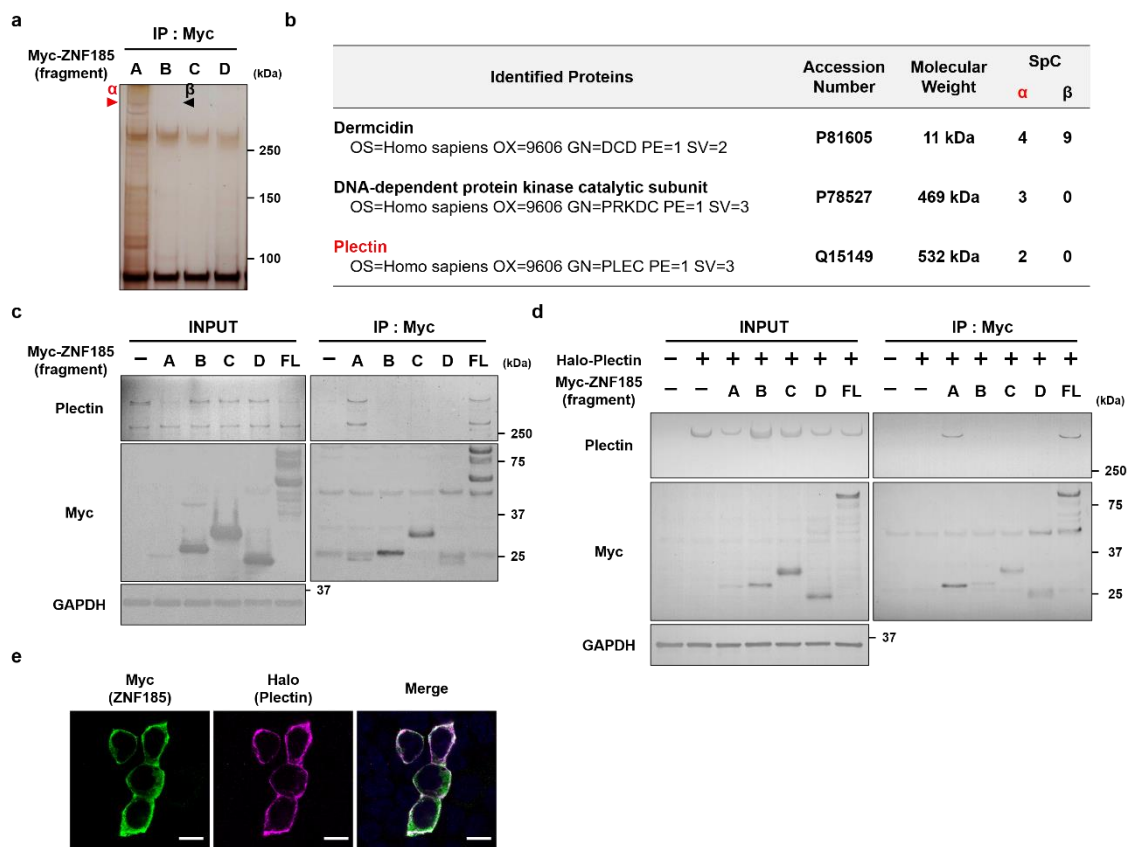

### Supplementary Figure 11 Identification of plectin as a ZNF185 interacting protein.

**a.** Representative silver staining of ZNF185 interacting proteins. The Myc-ZNF185 fragments indicated in Fig. 2c are overexpressed in HEK293T cells. Anti-Myc beads were used for coimmunoprecipitation. ZNF185 fragment A interacts with a protein indicated by  $\alpha$ . **b** Identified proteins by LC-MS/MS. SpC: spectral count. **c, d.** Plectin interacts with the N-terminal region of ZNF185. **c.** Endogenous plectin interacts with ZNF185 fragment A and full-length ZNF185. Anti-Myc beads were used for coimmunoprecipitation. Representative blots are shown ( $n = 3$ ). **d.** Overexpressed plectin interacts with ZNF185 fragment A and full-length ZNF185. Halo-plectin, Myc-ZNF185 fragments, and full-

length ZNF185 were overexpressed in HEK293T cells. Anti-Myc beads were used for coimmunoprecipitation. Representative blots are shown ( $n = 3$ ). e. ZNF185 and plectin are colocalized. Immunofluorescence image of Myc (green) and Halo (magenta) in HEK293T overexpressing Myc-ZNF185 and Halo-plectin. Representative images are shown ( $n = 3$ ). Scale bars, 10  $\mu\text{m}$ .

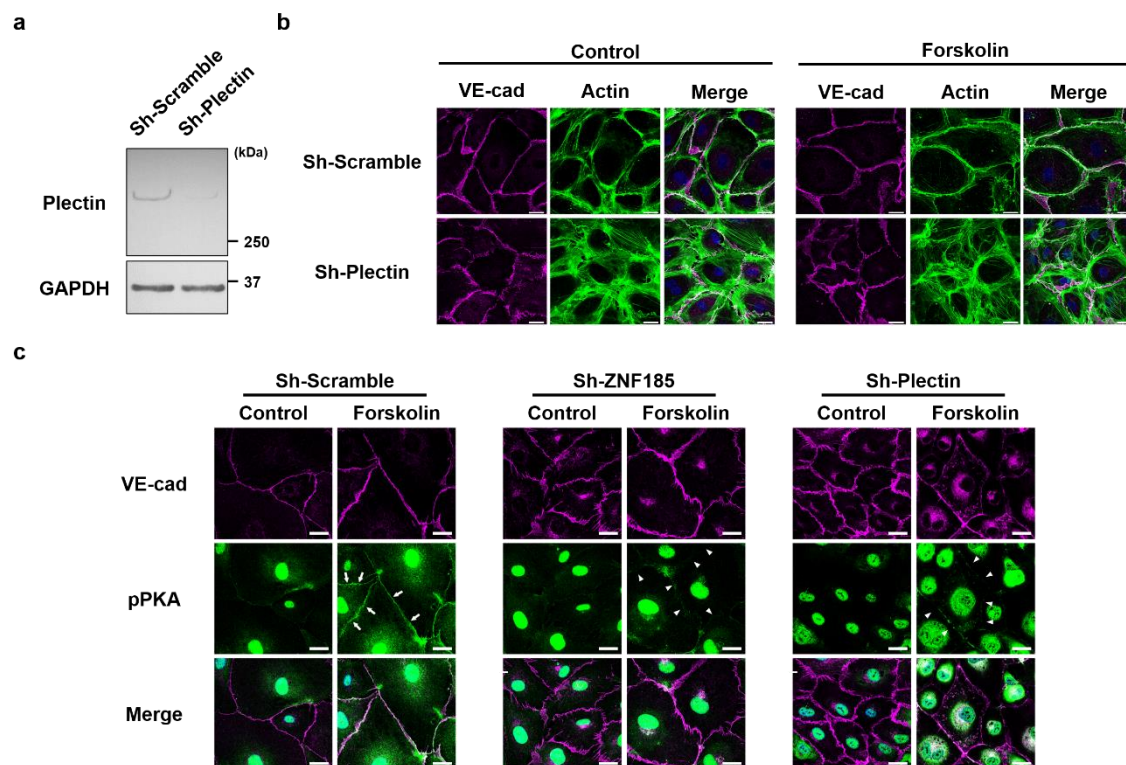

**Supplementary Figure 12 Knockdown of plectin induces stress fiber formation and impairs phosphorylation of PKA substrates.**

**a.** The protein expression of plectin is reduced by sh-plectin. Western blot analysis of plectin. Representative blots are shown ( $n = 3$ ). **b.** Plectin knockdown induces stress fiber formation and discontinuous cell-cell junctions in a confluent HUVEC monolayer. Immunofluorescence staining of VE-cadherin (magenta) and actin (green). Representative images are shown ( $n = 3$ ). Scale bars, 25  $\mu\text{m}$ . **c.** Knockdown of ZNF185 or plectin inhibits phosphorylation of PKA substrates at the membrane region. Immunofluorescence staining of pPKA in the presence or absence of 10  $\mu\text{M}$  forskolin in HUVECs transduced with scrambled, ZNF185, or plectin shRNA. Arrows indicate

phosphorylated PKA substrates at the membrane region. Arrowheads indicate the impairment of phosphorylation of PKA substrates. Immunofluorescence staining of VE-cadherin (magenta) and pPKA (green). Representative images are shown ( $n = 3$ ). Scale bars, 25  $\mu\text{m}$ .

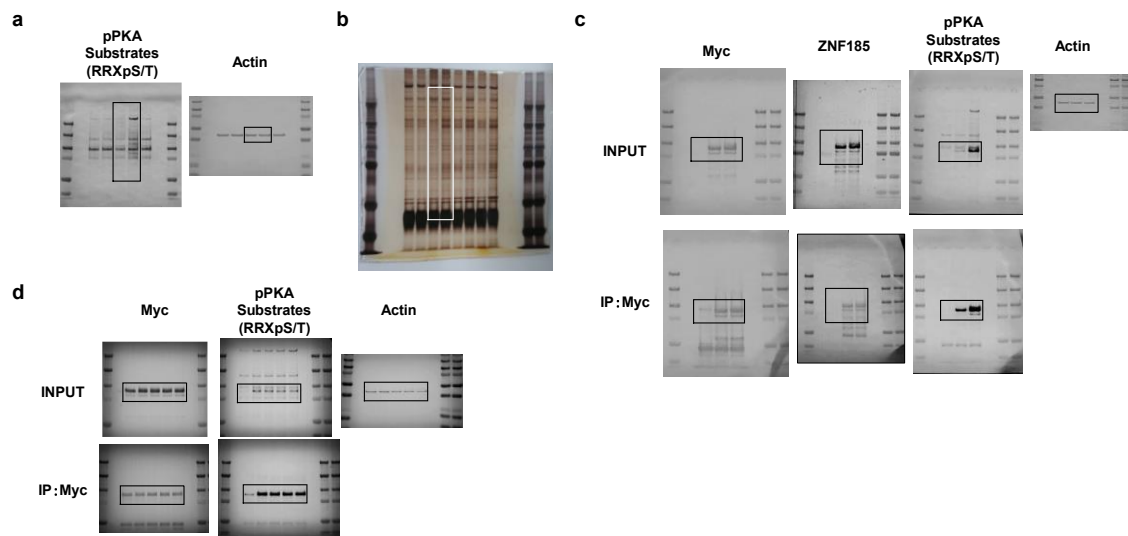

**Supplementary Figure 13 Uncropped western blots of Figure 1.**



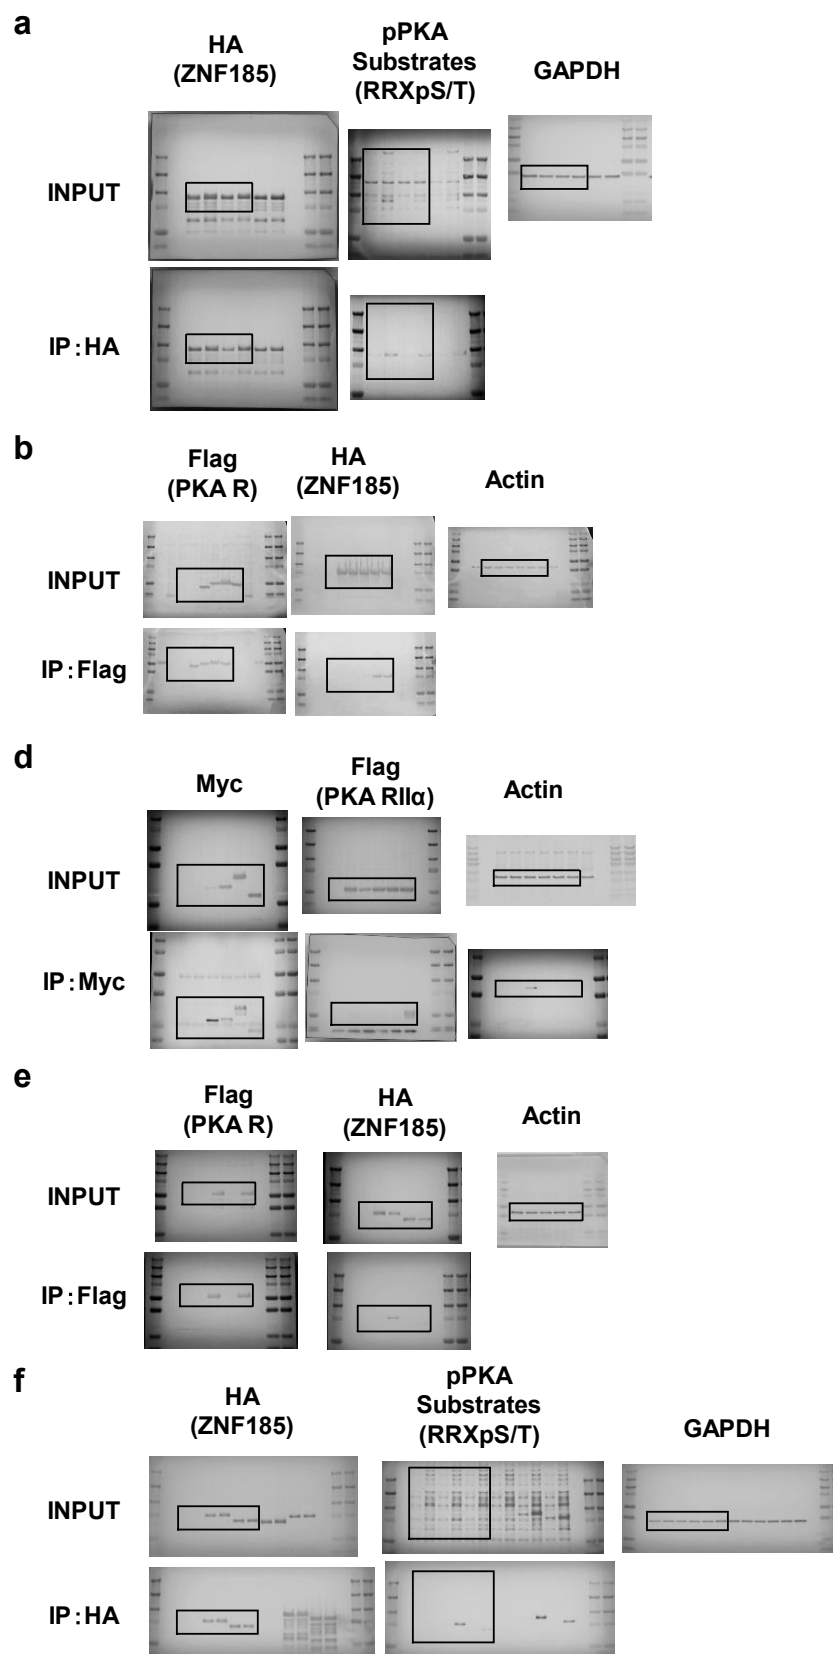

Supplementary Figure 14 Uncropped western blots of Figure 2.

**Figure 3**

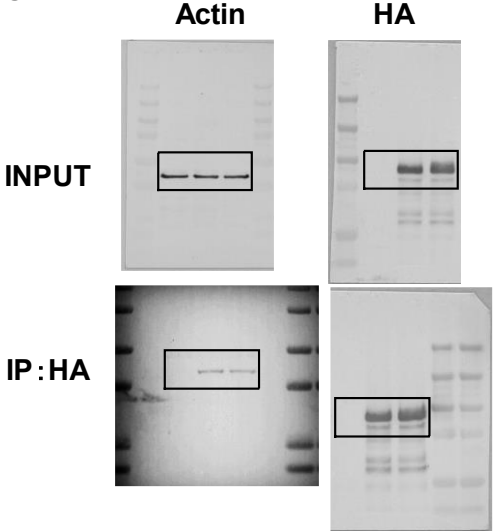

**Figure 4**

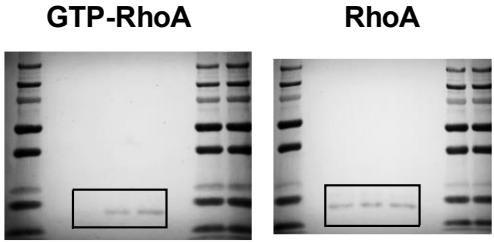

**Supplementary Figure 15 Uncropped western blots of Figure 3 and 4.**

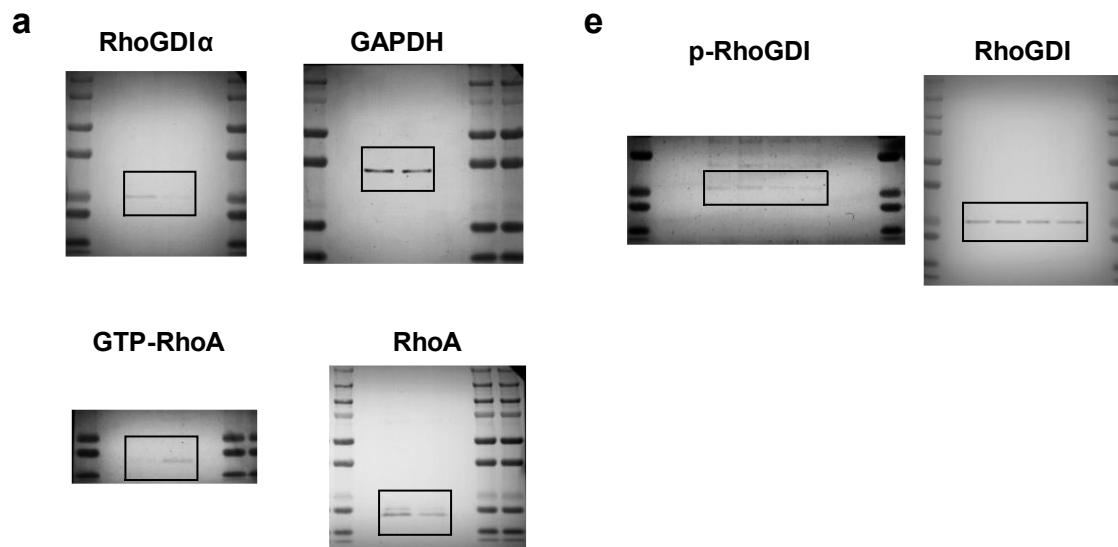

**Supplementary Figure 16 Uncropped western blots of Figure 5.**

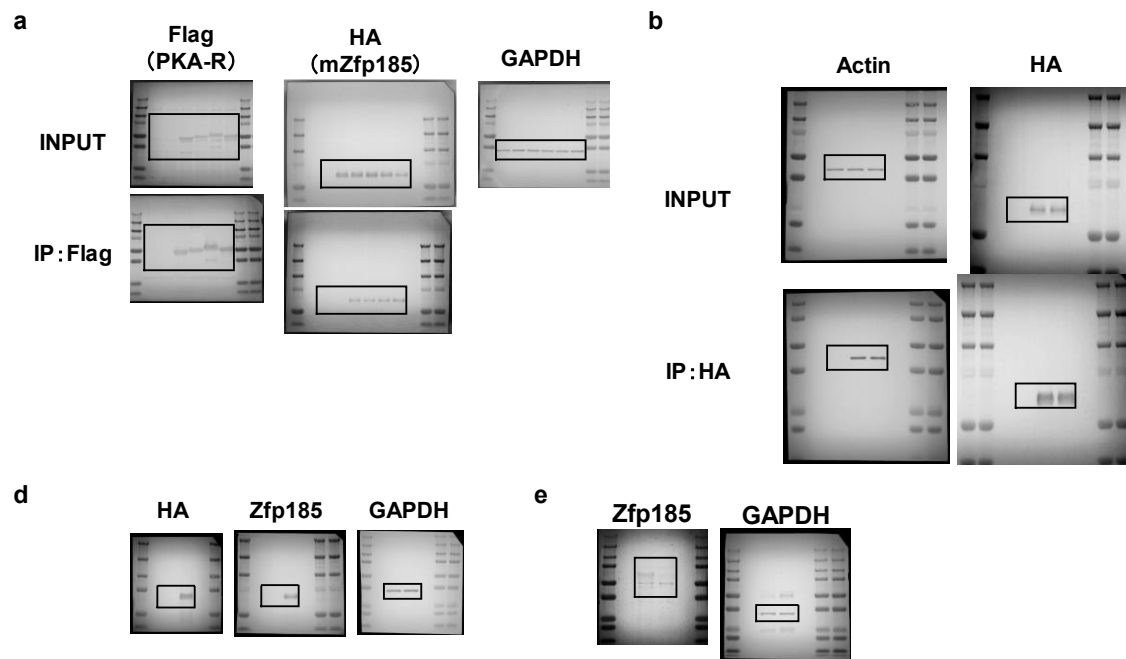

**Supplementary Figure 17 Uncropped western blots of Figure 6.**

**Figure 7**

**b**

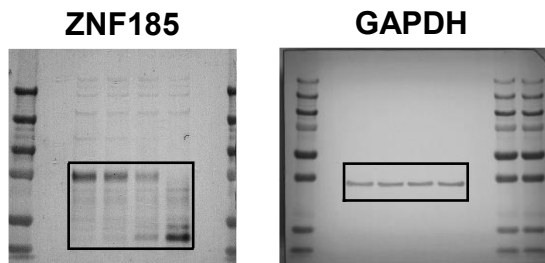

**c**

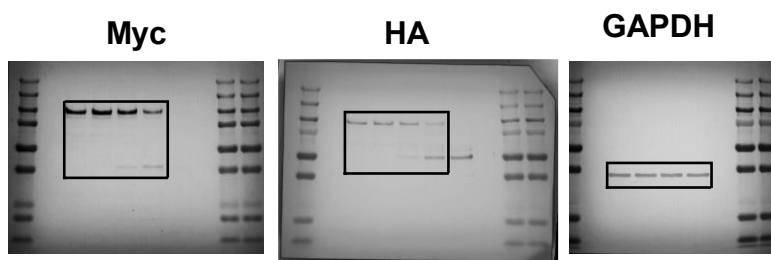

**d**

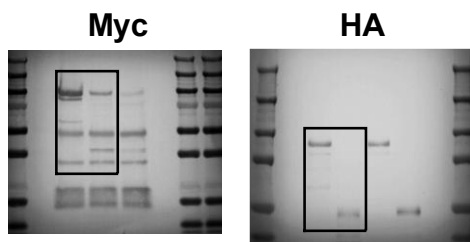

**f**

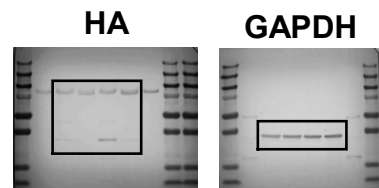

**Figure 8**

**d**

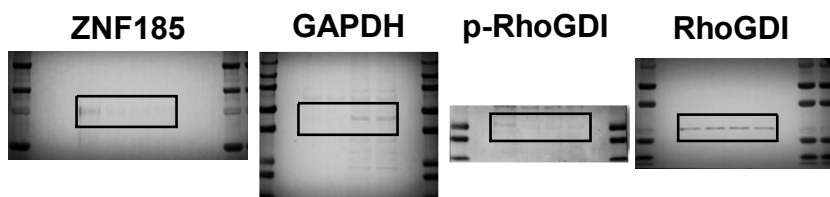

**Supplementary Figure 18 Uncropped western blots of Figure 7 and 8.**

**Supplementary Figure 3**

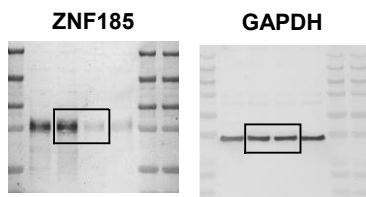

**Supplementary Figure 4**

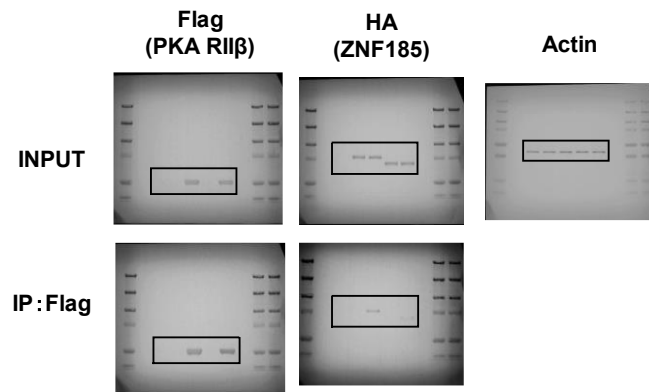

**Supplementary Figure 8**

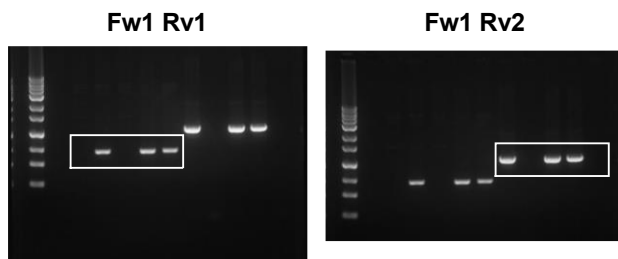

**Supplementary Figure 19** Uncropped western blots of Supplementary Figure 3, 4, and 8.

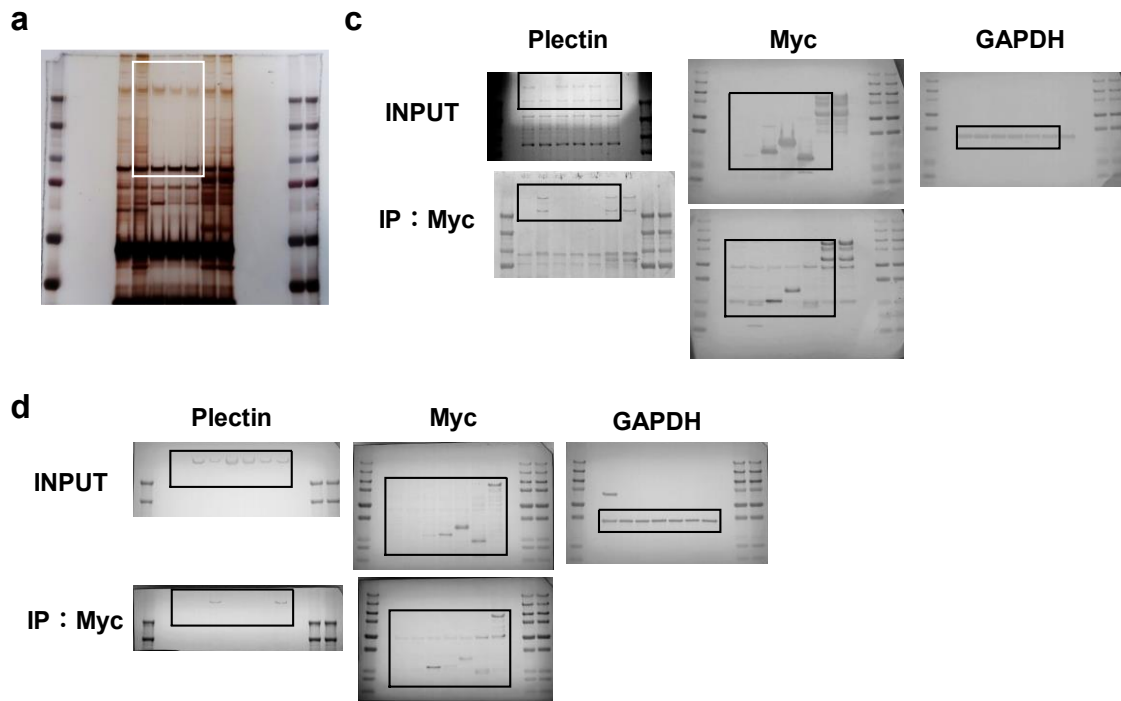

**Supplementary Figure 20 Uncropped western blots of Supplementary Figure 11.**

## Plectin

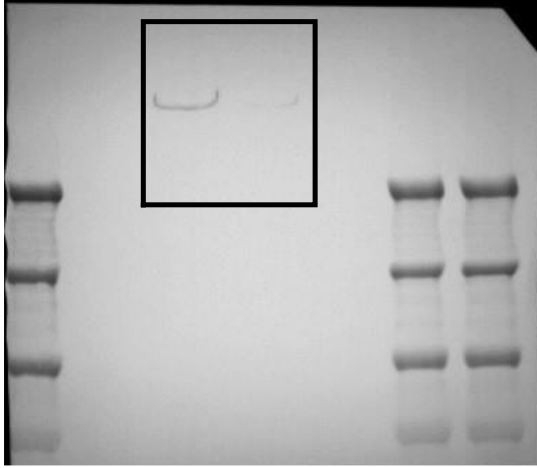

## GAPDH

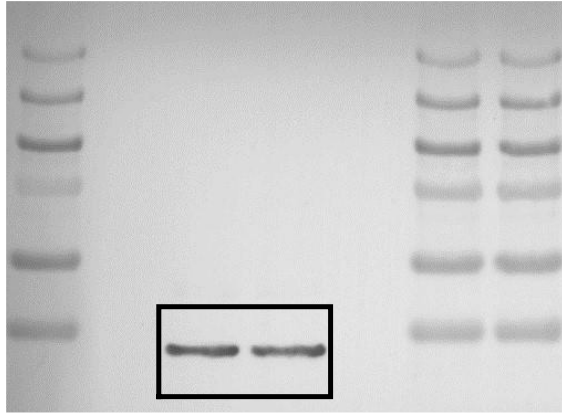

Supplementary Figure 21 Uncropped western blots of Supplementary Figure 12.



| Gene                             | Forward primer (5'→3')                                                                                                                                                     | Reverse primer (3'→5')                                                                                                                                             |
|----------------------------------|----------------------------------------------------------------------------------------------------------------------------------------------------------------------------|--------------------------------------------------------------------------------------------------------------------------------------------------------------------|
| <b>Myc-ZNF185-HA</b>             | AATTCAGTCGACTGGATCCGGTACCA<br>TGGGAGAACAAAAGTTGATTCTGAA<br>GAAGATTGGGAAGCGAACAAAAGTT<br>GATTTCTGAAGAAGATTGGGAAGCG<br>AACAAAAGTTGATTCTGAAGAAGATT<br>TGGGAAGCAGTATCTCAGCTCTT | GTACAAGAAAGCTGGGTCTAGATATC<br>TCTAAGCGTAATCCGGAACATCATA<br>GGGTAGCTTCCAGCGTAATCCGGAA<br>CATCATAACGGGTAGCTTCCAGCGTAA<br>TCCGGAACATCATAACGGGTAGAAGAG<br>CTTCTCATAGCA |
| <b>Myc-ZNF185-Δexon 11,12-HA</b> | TCCACTCCTGGCTCAAACAGGTCTTC<br>CCCAGGCAAC                                                                                                                                   | GTTGCCTGGGGAAGACCTGTTTGAG<br>CCAGGAGTGGA                                                                                                                           |
| <b>Myc-N-terminal ZNF185</b>     | AATTCAGTCGACTGGATCCGGTACCA<br>TGGGAGAACAAAAGTTGATTCTGAA<br>GAAGATTGGGAAGCGAACAAAAGTT<br>GATTTCTGAAGAAGATTGGGAAGCG<br>AACAAAAGTTGATTCTGAAGAAGATT<br>TGGGAAGCAGTATCTCAGCTCTT | GTACAAGAAAGCTGGGTCTAGATATC<br>TCTAGTTTGAGCCAGGAGTGGA                                                                                                               |
| <b>C-terminal ZNF185-HA</b>      | TCGACTGGATCCGGTACCATGAGGTC<br>TTCCCCAGGCAAC                                                                                                                                | GTACAAGAAAGCTGGGTCTAGATATC<br>TCTAAGCGTAATCCGGAACATCATA<br>GGGTAGCTTCCAGCGTAATCCGGAA<br>CATCATAACGGGTAGCTTCCAGCGTAA<br>TCCGGAACATCATAACGGGTAGAAGAG<br>CTTCTCATAGCA |

**Supplementary Table 1 Primer sequences.**
