# Supplementary material for: ZNF185 prevents stress fiber formation through the inhibition of RhoA in endothelial cells
Source: PubMed Central journal article supplement (PMC9834212; doi:10.1038/s42003-023-04416-x), 2023-01-11
Supplement: 42003_2023_4416_MOESM3_ESM.pdf [file 42003_2023_4416_MOESM3_ESM.pdf]

## Description of Additional Supplementary Files

**File name:** Supplementary Data 1

**Description:** The numerical source data for graphs and charts.
